# Supplementary material for: Simple and complex retinal dystrophies are associated with profoundly different disease networks
Source: PubMed Central journal article supplement (PMC5282568; doi:10.1038/srep41835), 2017-01-31
Supplement: srep41835-s1.pdf [file srep41835-s1.pdf]

Supplementary information for:

## **Simple and complex retinal dystrophies are associated with profoundly different disease networks**

**Christina Kiel<sup>1,2,\*</sup>, Claire Lastrucci<sup>1,2</sup>, Philip J. Luthert<sup>3</sup>, Luis Serrano<sup>1,2,4</sup>**

<sup>1</sup>EMBL/CRG Systems Biology Research Unit, Centre for Genomic Regulation (CRG),  
Barcelona Institute of Science and Technology, Dr. Aiguader 88, 08003 Barcelona, Spain

<sup>2</sup>Universitat Pompeu Fabra (UPF), 08003 Barcelona, Spain

<sup>3</sup>Department of Ocular Biology and Therapeutics, UCL Institute of Ophthalmology, and  
NIHR Biomedical Research Centre, University College London, 11-43 Bath Street, London  
EC1V 9EL, UK

<sup>4</sup>Institució Catalana de Recerca i Estudis Avançats (ICREA), Pg. Lluís Companys 23,  
08010 Barcelona, Spain

\*christina.kiel@crg.eu

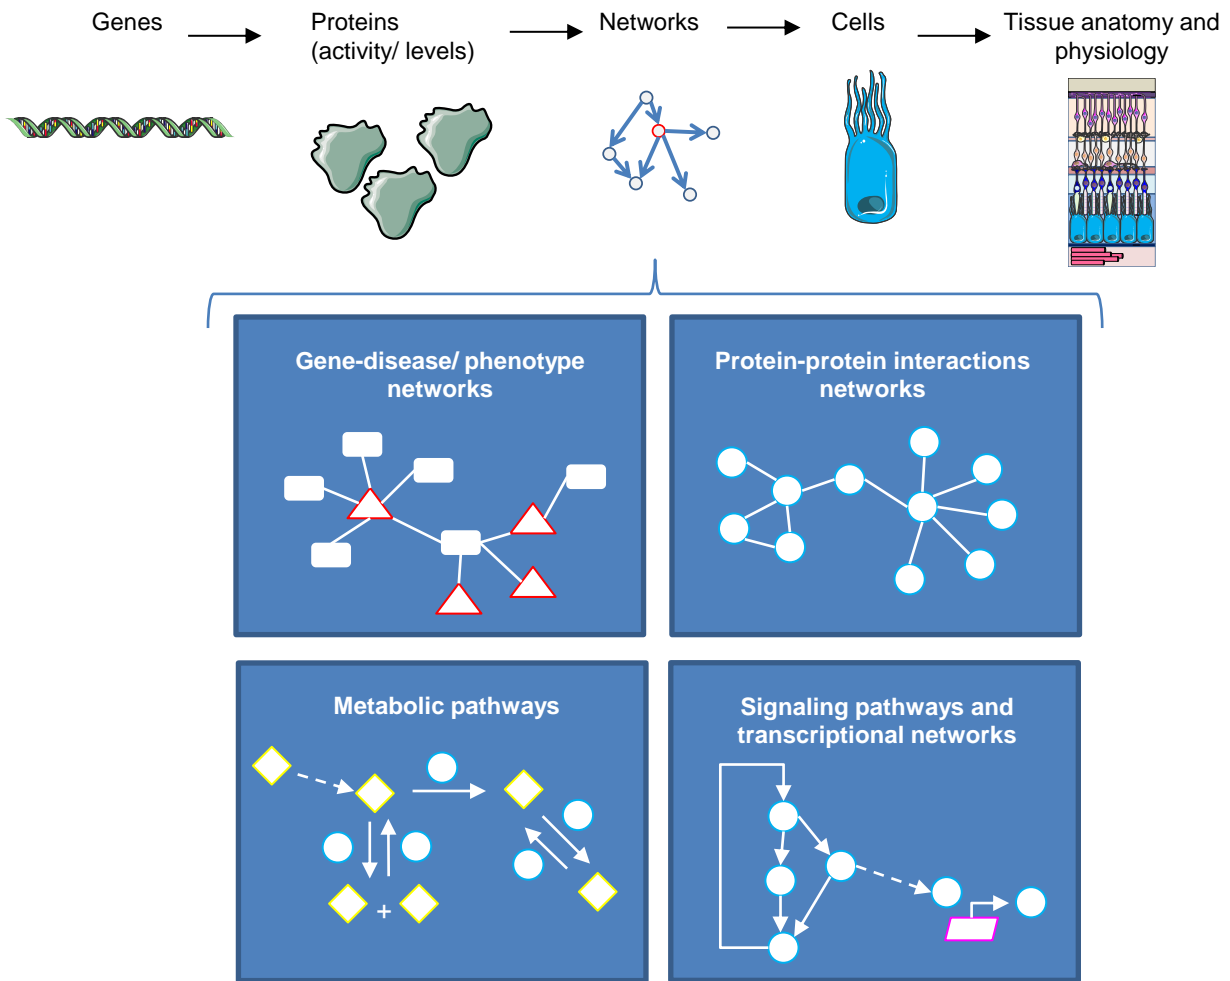

### Supplementary Figure 1

#### Schematic diagram illustrating a gene- and network-centric approach to molecular medicine.

In this approach the disease phenotype is considered as the consequence of perturbations of complex intra- and intercellular networks caused by genetic defects that spread along the network, which ultimately affects the cellular or tissue phenotype. There are different types of networks to be considered. For example, in gene-disease networks genes participating in the same disease are linked. Protein-protein interaction networks refer the physical interactions between proteins. Metabolic, signalling and transcriptional pathways include directionality, activities and feedback mechanisms. The figure was prepared using images from Servier Medical Art by Servier (<http://www.servier.com/Powerpoint-image-bank>), which is licensed under a Creative Commons Attribution 3.0 Unported License.

Related to Figure 1b.

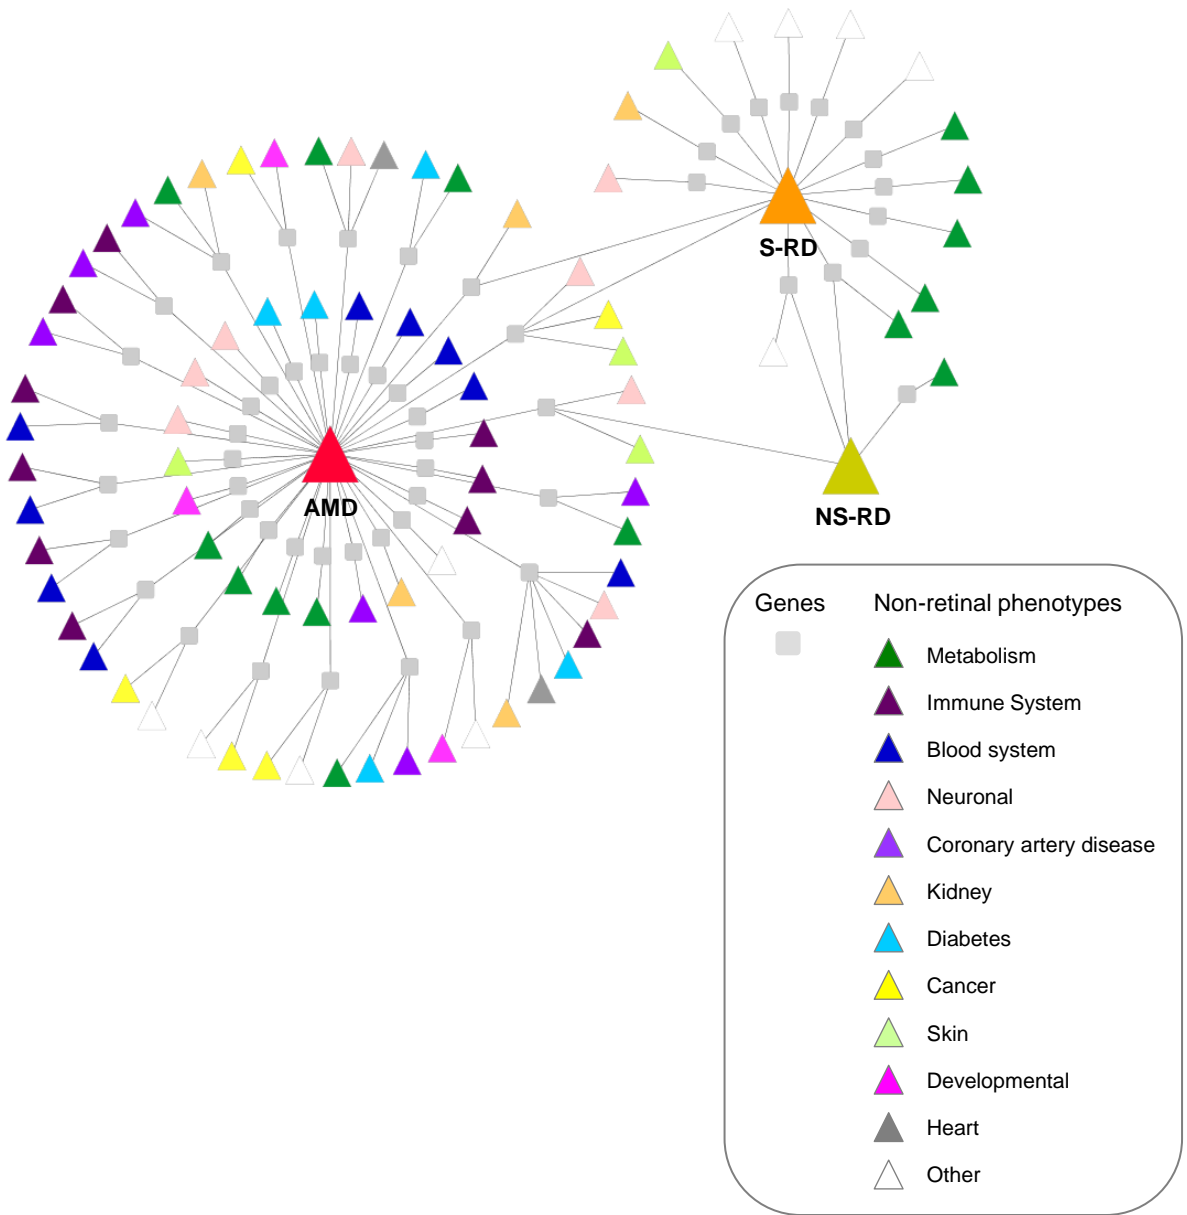

## Supplementary Figure 2

### RD genes associated to non-retinal phenotypes.

Network representation of the association between diseases and RD genes that additionally have a non-retinal phenotype. Boxes represent genes and triangles diseases or phenotypes. Monogenic non-syndromic RD are coloured in yellow, monogenic syndromic RD are coloured in orange, and AMD in red (see network). The remaining triangles represent disease or phenotypes that manifest in tissues outside the eye (non-vision related, see legend).

Related to Figure 1b.

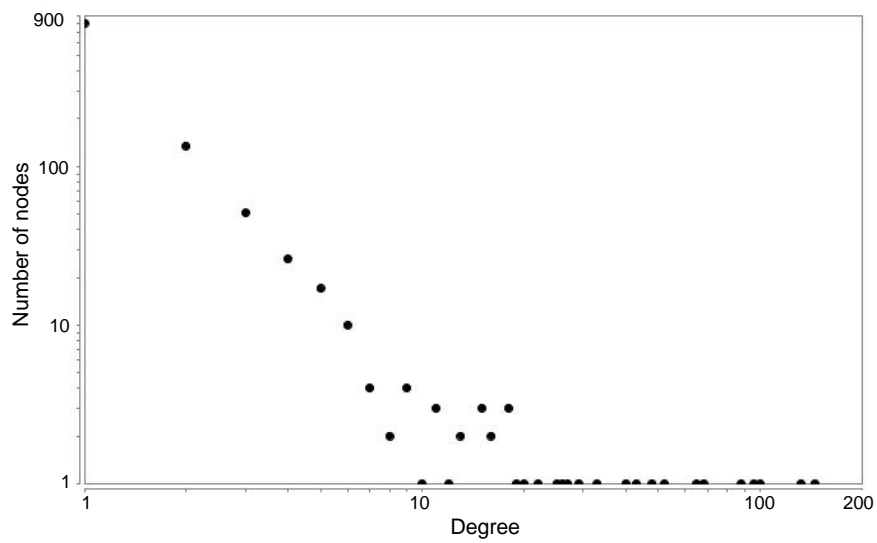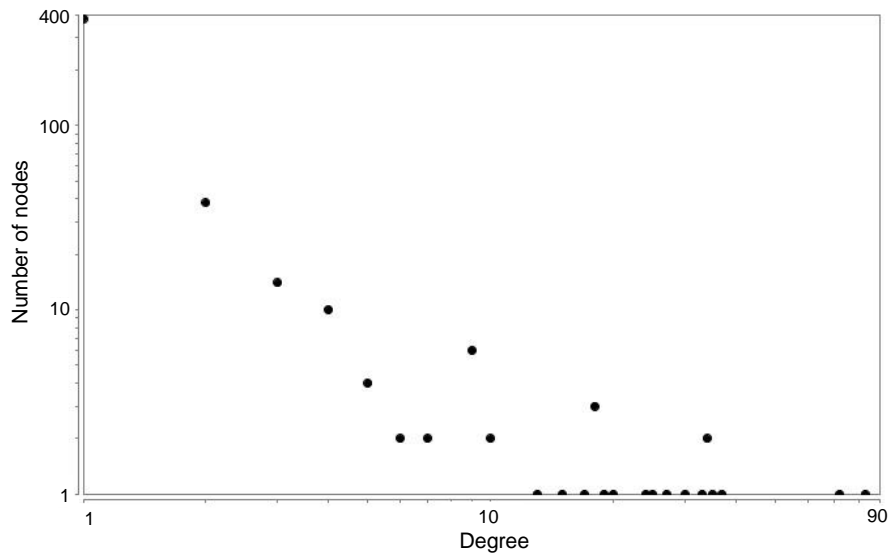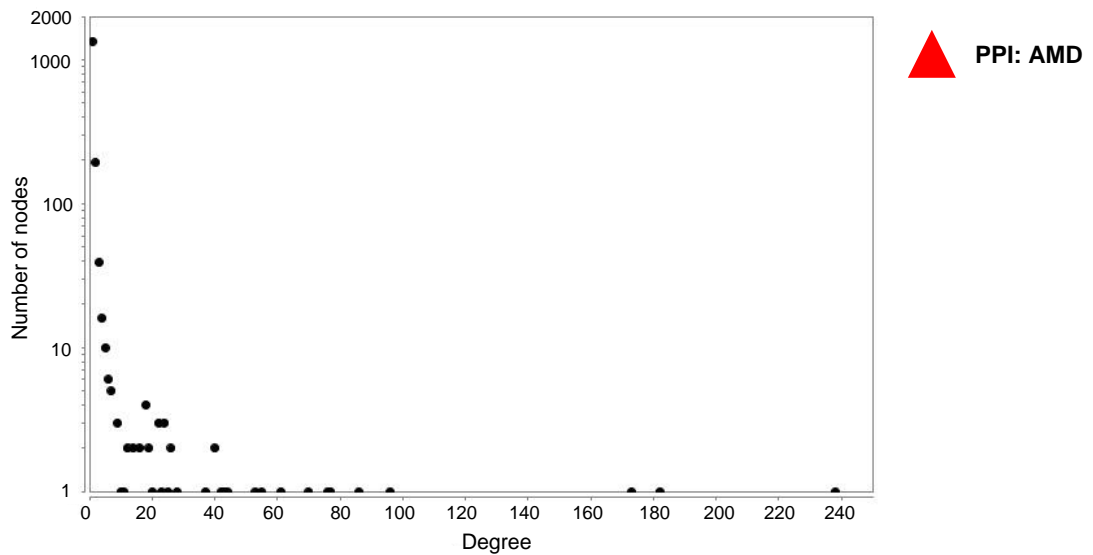

### Supplementary Figure 3

#### Degree distribution of proteins in the three protein-protein interaction (PPI) networks.

Diagrams of the degree distributions (number of interaction partners) for all nodes (proteins) in the three PPI networks (M-NS RD, M-S RD, and AMD) are depicted. The network statistics and plots were calculated using the Cytoscape 'NetworkAnalyzer' plugin.

Related to Figure 2a.

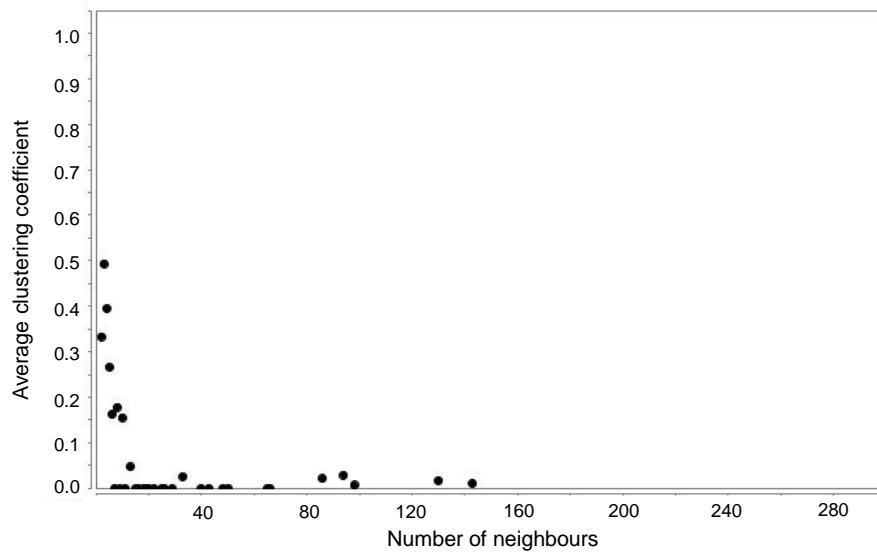

**PPI: M-NS RD**

Average clustering coefficient in the network: 0.081

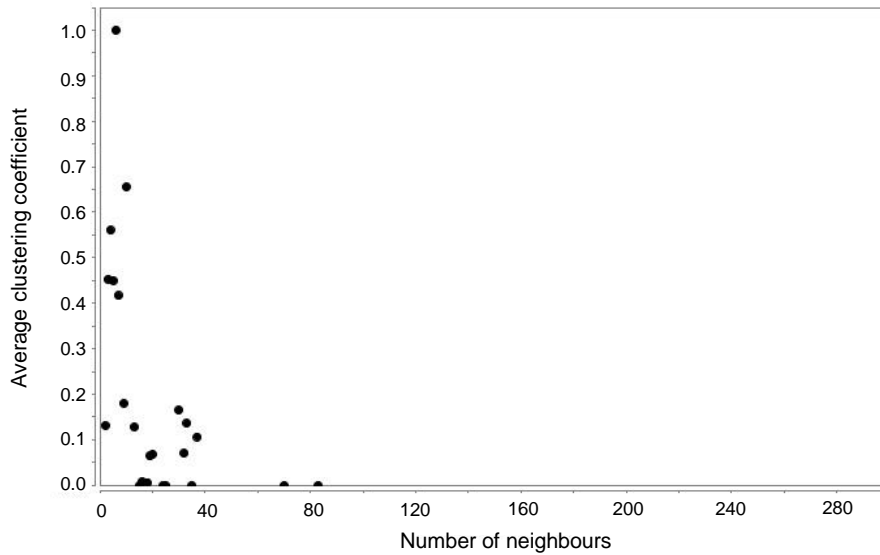

**PPI: M-S RD**

Average clustering coefficient in the network: 0.052

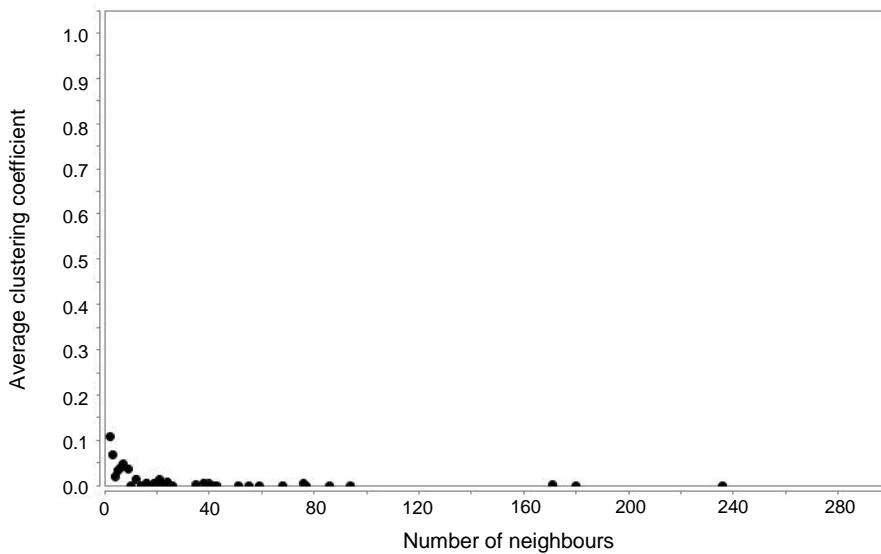

**PPI: AMD**

Average clustering coefficient in the network: 0.015

**Supplementary Figure 4**

**Average clustering distribution of proteins in the three protein-protein interaction (PPI) networks.**

Diagrams of the average clustering coefficients in the three PPI networks (M-NS RD, M-S RD, and AMD) are depicted. The network statistics and plots were calculated using the Cytoscape 'NetworkAnalyzer' plugin.

Related to Figure 2a.

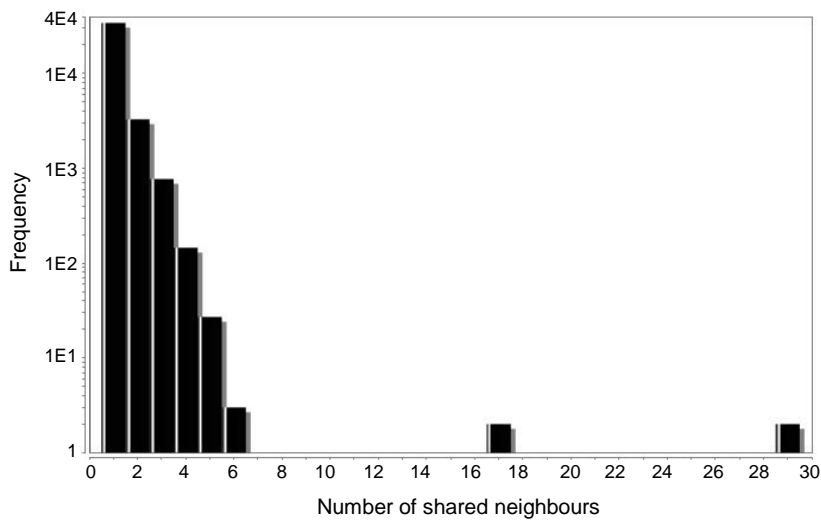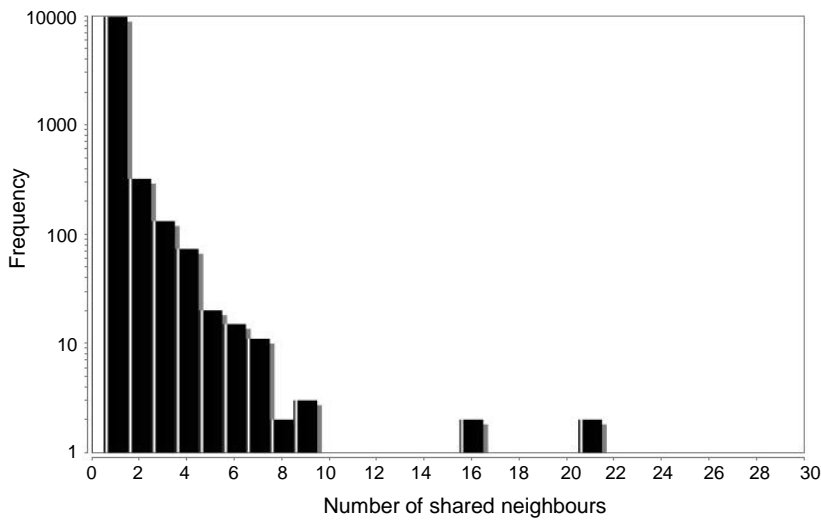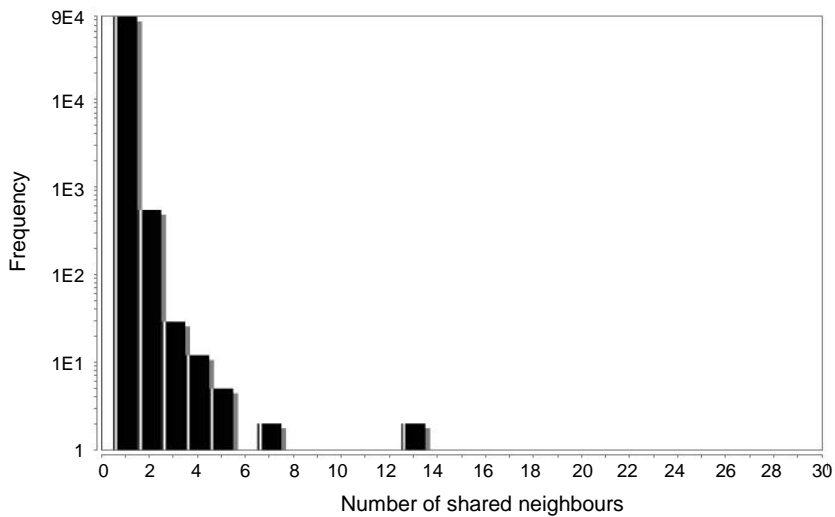

**Supplementary Figure 5**

**Shared neighbour distribution of proteins in the three protein-protein interaction (PPI) networks.**

Diagrams of the shared neighbour distribution in the three PPI networks (M-NS RD, M-S RD, and AMD) are depicted. The network statistics and plots were calculated using the Cytoscape 'NetworkAnalyzer' plugin.

Related to Figure 2a.

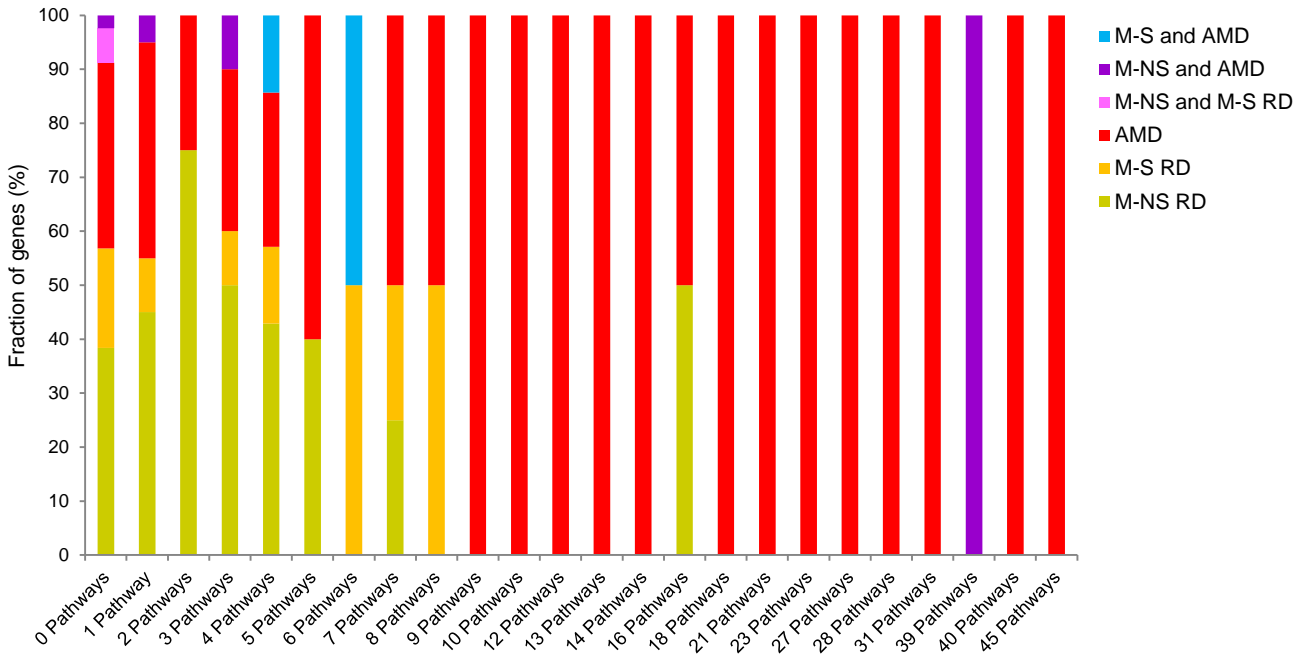

### Supplementary Figure 6

#### Fraction of proteins associated to different pathways based on the HPD database.

Fraction of genes associated to a certain number of pathways coloured according to the different RD classes (see legend).

Related to Figure 2b.

| source | term name<br>(Gene Ontology (Biological process))                  | term ID   | n. of genes | n. of genes | n. of corrected p-value |          |
|--------|--------------------------------------------------------------------|-----------|-------------|-------------|-------------------------|----------|
| BP     | biological process                                                 | 00-000001 | 16836       | 95          | 3.02e-02                |          |
| BP     | multicellular organismal process                                   | 00-000002 | 1036        | 95          | 1.52e-39                |          |
| BP     | neurological process                                               | 00-000003 | 55          | 64          | 1.21e-05                |          |
| BP     | neurological system process                                        | 00-000004 | 1383        | 64          | 4.22e-49                |          |
| BP     | sensory perception                                                 | 00-000005 | 539         | 63          | 9.70e-56                |          |
| BP     | sensory perception of light stimulus                               | 00-000006 | 207         | 56          | 1.72e-95                |          |
| BP     | visual perception                                                  | 00-000007 | 207         | 56          | 1.72e-95                |          |
| BP     | single-multicellular organism process                              | 00-004707 | 5540        | 95          | 2.61e-02                |          |
| BP     | response to stimulus                                               | 00-000008 | 8287        | 95          | 1.06e-05                |          |
| BP     | response to abiotic stimulus                                       | 00-000009 | 4257        | 79          | 1.06e-05                |          |
| BP     | response to biotic stimulus                                        | 00-000010 | 4030        | 79          | 1.06e-05                |          |
| BP     | cellular response to abiotic stimulus                              | 00-006238 | 1174        | 95          | 38                      | 2.11e-18 |
| BP     | cellular response to biotic stimulus                               | 00-007124 | 287         | 18          | 1.02e-09                |          |
| BP     | response to light stimulus                                         | 00-000011 | 96          | 36          | 1.02e-09                |          |
| BP     | response to light intensity                                        | 00-000012 | 35          | 36          | 1.02e-09                |          |
| BP     | response to light stimulus                                         | 00-000013 | 11          | 36          | 3.92e-02                |          |
| BP     | cellular response to radiation                                     | 00-007478 | 128         | 15          | 4.11e-12                |          |
| BP     | response to external stimulus                                      | 00-000014 | 128         | 15          | 4.11e-12                |          |
| BP     | detection of external stimulus                                     | 00-000015 | 2483        | 95          | 42                      | 1.70e-10 |
| BP     | detection of external stimulus                                     | 00-000016 | 134         | 34          | 1.30e-41                |          |
| BP     | detection of light stimulus                                        | 00-000017 | 18          | 9           | 1.25e-13                |          |
| BP     | detection of light stimulus involved in sensory perception         | 00-000018 | 112         | 31          | 1.24e-43                |          |
| BP     | photoreception of light stimulus                                   | 00-000019 | 113         | 31          | 1.24e-43                |          |
| BP     | photoreception of light stimulus involved in visual perception     | 00-000020 | 113         | 31          | 1.24e-43                |          |
| BP     | phototransduction, visible light                                   | 00-000021 | 97          | 24          | 1.43e-31                |          |
| BP     | rhodopsin mediated signaling pathway                               | 00-000022 | 30          | 14          | 4.06e-20                |          |
| BP     | homeostatic process                                                | 00-000023 | 96          | 14          | 4.06e-20                |          |
| BP     | anatomical structure morphogenesis                                 | 00-000024 | 341         | 17          | 2.09e-09                |          |
| BP     | multicellular organismal homeostasis                               | 00-004871 | 327         | 17          | 1.05e-09                |          |
| BP     | multicellular organismal homeostasis                               | 00-000025 | 291         | 17          | 3.48e-13                |          |
| BP     | tissue homeostasis                                                 | 00-000026 | 291         | 17          | 3.48e-13                |          |
| BP     | regulation of G-protein coupled receptor protein signaling pathway | 00-004544 | 35          | 15          | 5.52e-23                |          |
| BP     | regulation of G-protein coupled receptor protein signaling pathway | 00-000277 | 128         | 12          | 3.05e-09                |          |
| BP     | cilia morphogenesis                                                | 00-000200 | 34          | 12          | 1.02e-16                |          |
| BP     | cilia morphogenesis                                                | 00-006271 | 221         | 95          | 3.08e-02                |          |
| BP     | single-organism developmental process                              | 00-004707 | 9569        | 48          | 4.04e-02                |          |
| BP     | nerve system development                                           | 00-000759 | 2285        | 39          | 1.52e-02                |          |
| BP     | anatomical structure morphogenesis                                 | 00-000023 | 2894        | 33          | 8.14e-04                |          |
| BP     | anatomical structure morphogenesis                                 | 00-000024 | 3045        | 36          | 4.43e-04                |          |
| BP     | organ morphogenesis                                                | 00-000743 | 504         | 29          | 8.06e-20                |          |
| BP     | eye development                                                    | 00-000024 | 332         | 28          | 1.37e-23                |          |
| BP     | eye morphogenesis                                                  | 00-000025 | 143         | 21          | 7.20e-20                |          |
| BP     | organ morphogenesis                                                | 00-000987 | 901         | 23          | 1.42e-07                |          |
| BP     | sensory organ morphogenesis                                        | 00-000986 | 250         | 20          | 1.62e-15                |          |
| BP     | eye morphogenesis                                                  | 00-000026 | 143         | 21          | 7.20e-20                |          |
| BP     | retina development, in camera-type eye                             | 00-000941 | 134         | 23          | 4.11e-26                |          |
| BP     | retina development, in camera-type eye                             | 00-000942 | 46          | 11          | 6.24e-13                |          |
| BP     | neural system development                                          | 00-000029 | 1506        | 25          | 4.32e-04                |          |
| BP     | generation of neurons                                              | 00-000029 | 1506        | 25          | 4.32e-04                |          |
| BP     | neural retina development                                          | 00-000407 | 53          | 11          | 3.52e-12                |          |
| BP     | retina layer formation                                             | 00-000842 | 22          | 5           | 1.39e-04                |          |
| BP     | neurogenesis                                                       | 00-000029 | 1504        | 20          | 1.61e-29                |          |
| BP     | neurogenesis                                                       | 00-004530 | 45          | 95          | 20                      | 1.61e-29 |
| BP     | eye photoreceptor cell differentiation                             | 00-000754 | 45          | 16          | 4.82e-23                |          |
| BP     | camera-type eye photoreceptor cell differentiation                 | 00-000754 | 45          | 16          | 4.82e-23                |          |
| BP     | neuron development                                                 | 00-000029 | 8           | 4           | 1.39e-06                |          |
| BP     | neuron development                                                 | 00-004856 | 1344        | 56          | 21                      | 1.39e-03 |
| BP     | photoreceptor cell development                                     | 00-004261 | 41          | 16          | 7.01e-24                |          |
| BP     | photoreceptor cell development                                     | 00-004262 | 35          | 13          | 5.64e-29                |          |
| BP     | retinal rod cell development                                       | 00-004548 | 11          | 56          | 3.72e-04                |          |
| BP     | retinal cone cell development                                      | 00-004549 | 8           | 4           | 8.13e-05                |          |
| BP     | retinal cone cell development                                      | 00-004550 | 8           | 4           | 8.13e-05                |          |
| BP     | positive regulation of rhodopsin gene expression                   | 00-004272 | 2           | 56          | 2                       | 4.58e-02 |
| BP     | isoprenoid metabolic process                                       | 00-000720 | 126         | 95          | 8                       | 4.54e-04 |
| BP     | terpenoid metabolic process                                        | 00-000721 | 100         | 95          | 8                       | 1.10e-04 |
| BP     | terpenoid metabolic process                                        | 00-000501 | 94          | 95          | 8                       | 4.58e-05 |
| BP     | vitamin K metabolic process                                        | 00-000776 | 9           | 56          | 3                       | 2.09e-02 |
| BP     | retinal metabolic process                                          | 00-004272 | 26          | 95          | 4                       | 1.62e-02 |
| BP     | spliceosomal tri-snRNP complex assembly                            | 00-000244 | 12          | 95          | 4                       | 5.66e-04 |
| BP     | protein localization to cilium                                     | 00-006102 | 27          | 95          | 4                       | 1.58e-02 |
| BP     | protein localization to nonciliary primary cilium                  | 00-000969 | 9           | 95          | 3                       | 2.08e-02 |

Supplementary Figure 7



## **Supplementary Figure 7**

### **Gene ontology process enrichment for M-NS RD.**

Enrichment analysis for the Gene ontology (GO) 'Biological Process' for M-NS RD genes using g:Profiler.

Related to Figure 3.



## **Supplementary Figure 8**

### **Gene ontology process enrichment for M-S RD.**

Enrichment analysis for the Gene ontology (GO) 'Biological Process' for M-S RD genes using g:Profiler.

Related to Figure 3.



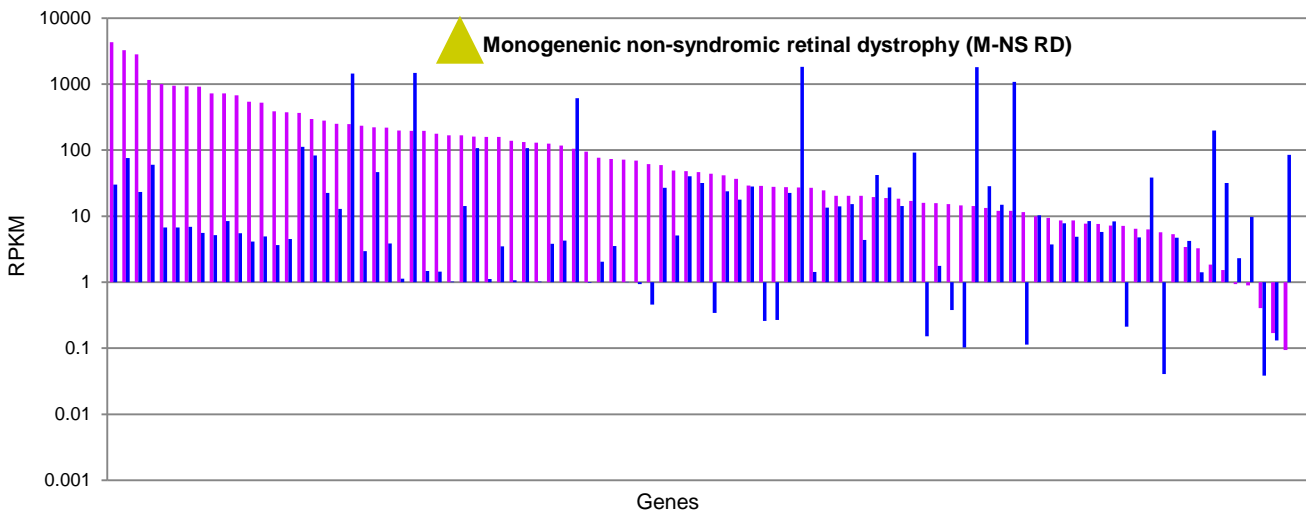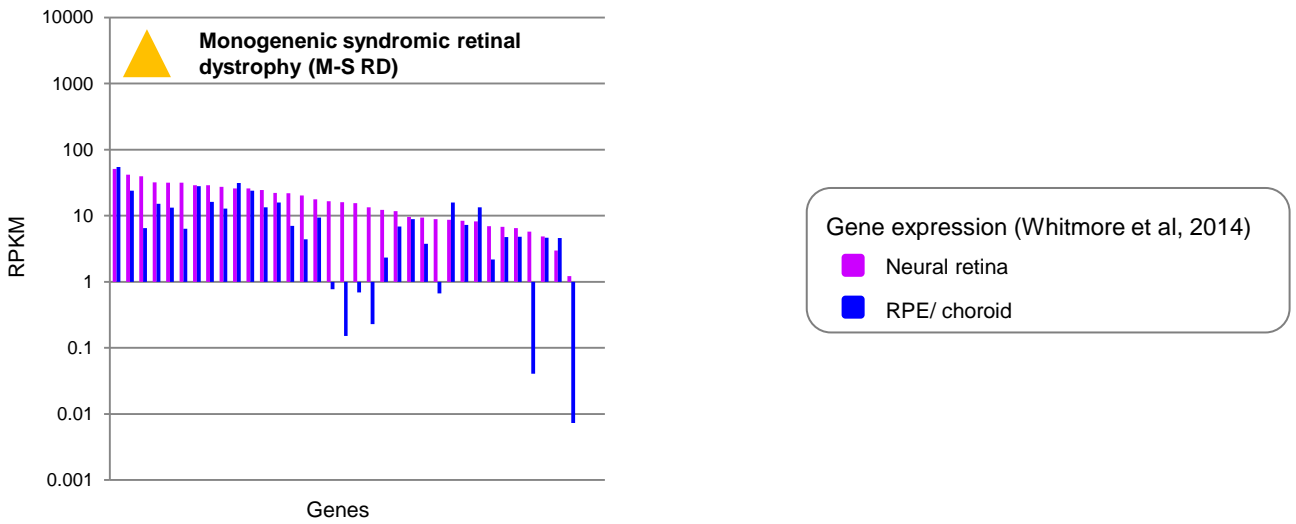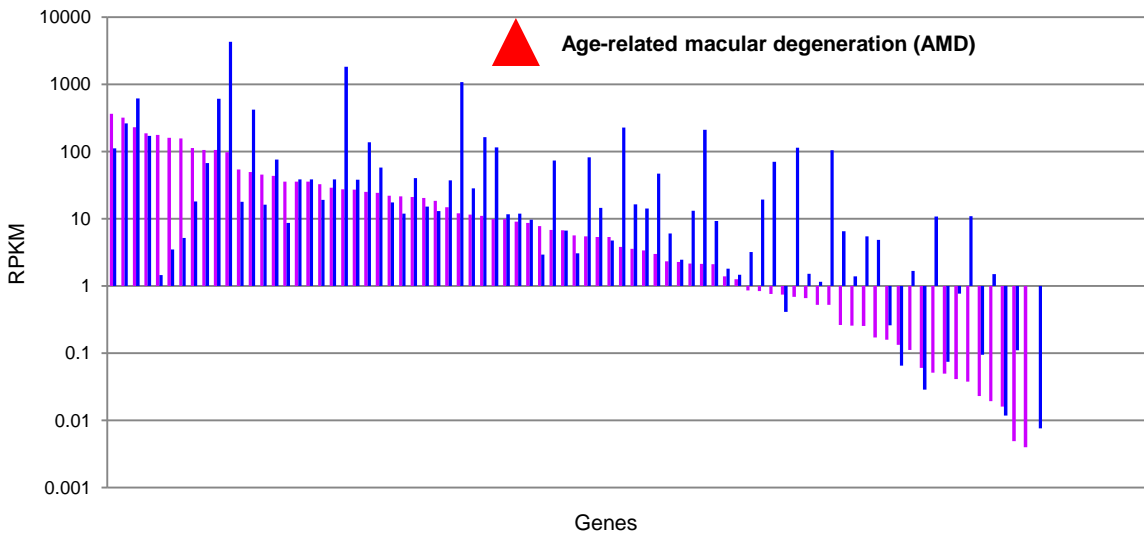

### Supplementary Figure 10

#### Gene expression levels in retinal tissues.

Average gene expression levels in neural retina and RPE/ choroid (see Whitmore et al, 2014) displayed separately for genes related to monogenic non-syndromic RD, monogenic syndromic RD, and AMD. Genes are sorted by decreasing expression levels in neural retina.

Related to Figure 4.

## **Supplementary Tables (online)**

### **Supplementary Table S1**

**Disease associations of 208 genes related to retinal dystrophies (RD), functional classification and expression levels in retinal cell types.**

Related to Figure 1b, Figure 3 and Figure 4.

### **Supplementary Table S2**

**Interaction networks reconstructed among RD genes using the HIPPIE database.**

Related to Figure 2a.

### **Supplementary Table S3**

**Pathway information obtained from the HPD database.**

Related to Figure 2b.

### **Supplementary Table S4**

**Processes and modulators in the physiological condition, during ageing, and in AMD pathogenesis.**

Related to Figure 4.

### **Supplementary Table S5**

**Generation of a list of genes associated to AMD.**

Related to Figure 1b.
